# Supplementary material
Source: publisher figshare collection journal article supplement (https://geolsoc.figshare.com/ndownloader/files/28250027)
Supplement: Supplementary file 1 [file 28250027]

Table 4. Raman Spectroscopy heavy mineral analysis
	Sample	At	Ap	Cr	Ru	To	Zr	Br	count	ZTR
Tullig	212	8.1	17.8	0	29.6	29.6	10.4	4.4	135	-
Tullig	219	20.9	10.4	0	40.1	5.5	20.3	2.7	182	-
Tullig	304	16.9	6.8	0	52.5	6.8	5.1	6.8	59	-
Bridges of Ross	403	28.2	2.2	0	47	8.3	9.4	5	181	-
Bridges of Ross	406	16.5	2.9	1	55.8	3.9	15.5	4.4	206	-
Bridges of Ross	409A	23	2.8	0	58.4	5.1	7.3	3.4	178	-
Bridges of Ross	411A	14.4	4.3	0.5	37.8	7.4	34.6	1.1	188	-
Bridges of Ross	412	23.7	2.5	0	47.7	11.5	10	4.7	279	-
Bridges of Ross	413A	18.2	3.6	0.5	44.5	10	22.7	0.5	220	-
Bridges of Ross	414A	22.6	5	0	47.2	9	13.6	2.5	199	-
Bridges of Ross	414B	26.2	4.6	0	46.7	9.2	8.7	4.6	195	-
Ballybunion	603	11.7	3.8	7.5	54.9	4.7	16.4	0.9	213	76.1
Ballybunion	605	26.7	4.3	0	39.6	10.4	17.2	1.8	326	67.2
Ballybunion	607	22.8	6.9	0	47.2	5.9	14.7	2.5	320	67.8
At: Anatase; Ap: Apatite; Cr: Chrome spinel; Ru: Rutile; To: Tourmaline; Zr: Zircon; Br: Brookite
ZTR: zircon tourmaline rutile index
Heavy mineral data given as percentages
